# Supplementary material
Source: PubMed Central journal article supplement (PMC5594680)
Supplement: pnas.1707186114.sapp.pdf [file pnas.1707186114.sapp.pdf]

## SI Appendix for *Caterpillars lack a resident gut microbiome*

### SI Figures

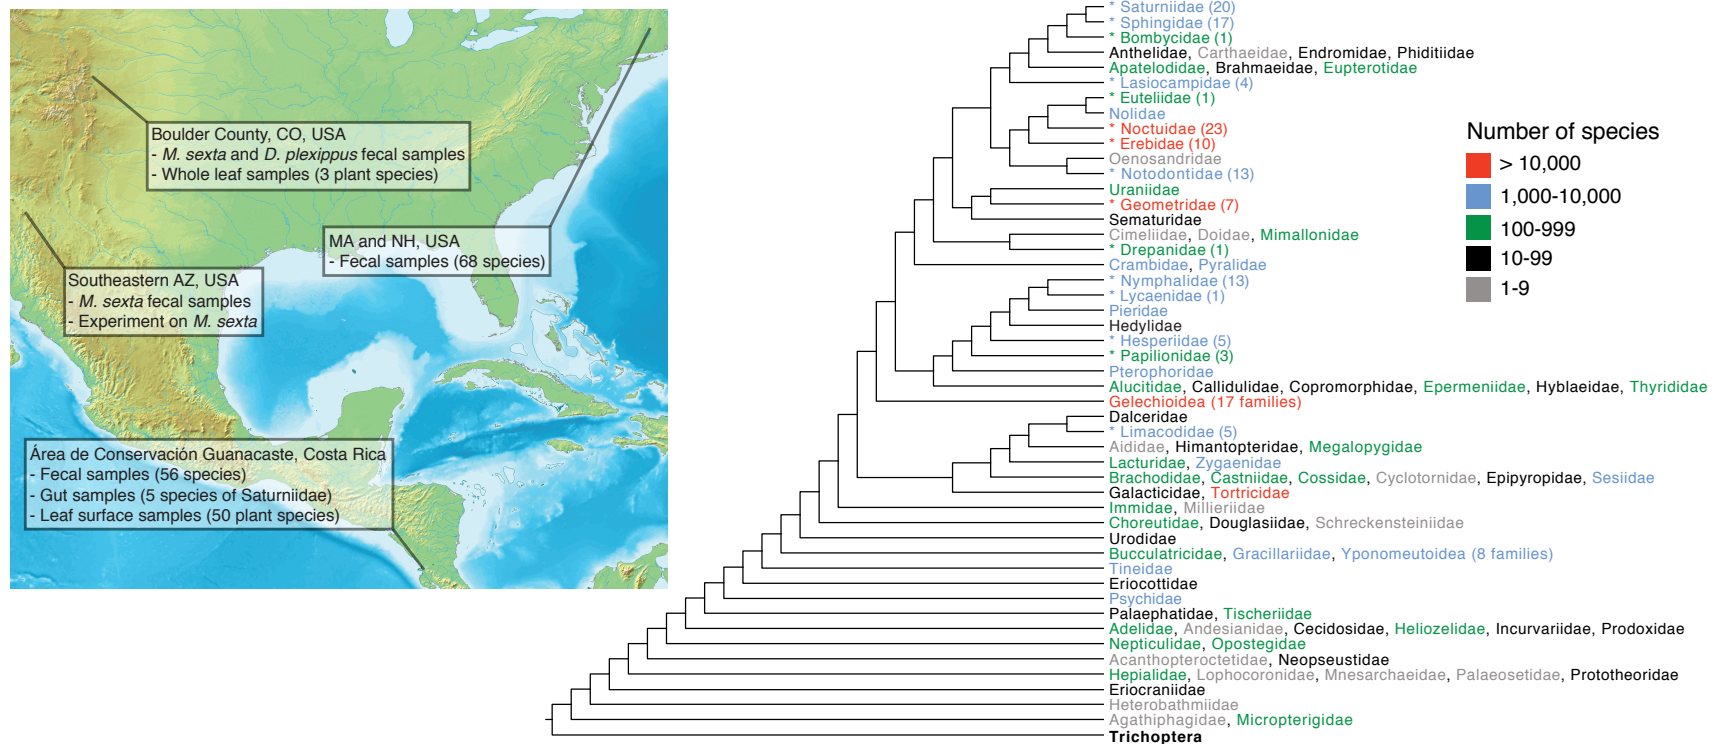

Figure S1. The caterpillar species included in this study and their phylogenetic placement (cladogram adapted from the “nt123\_degen1” tree of Regier et al. (1)). Asterisks show sampled families of Lepidoptera, with the number of sampled species given in parentheses. To indicate the distribution of diversity (and taxonomic effort) across the tree, family names are colored by the number of described species given in (2). Inset: caterpillar sampling or experiment localities. Map from Wikimedia Commons.

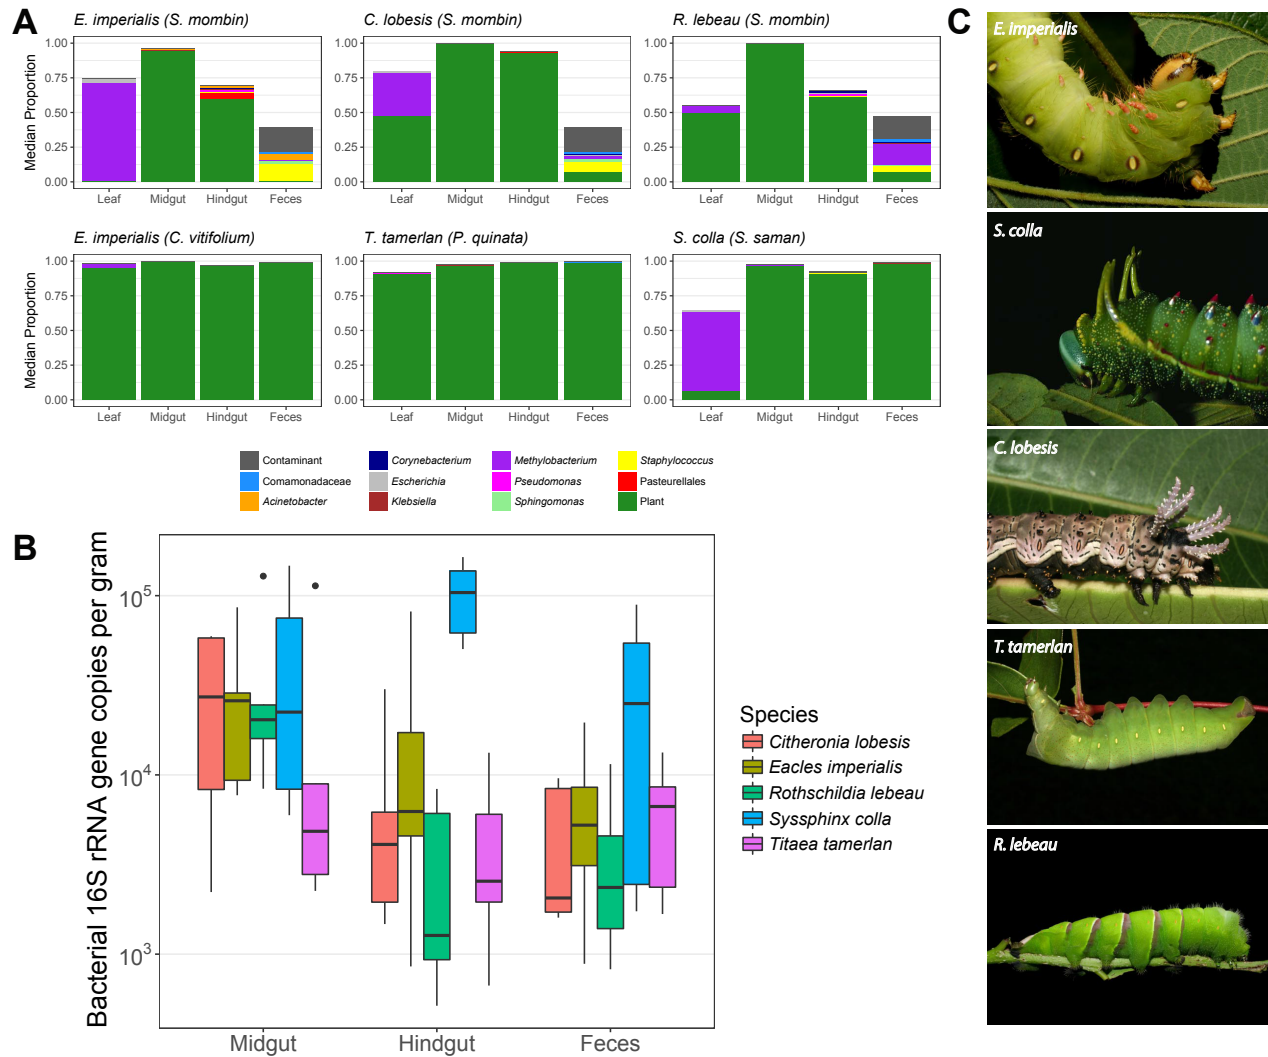

**Figure S2.** Bacterial community composition and density in five caterpillar species (Saturniidae). A) The composition of sequence libraries from the leaf surface, midgut, hindgut, and feces. The median across five replicate individuals is displayed. The food plant species is indicated in parentheses. Note that one species, *Eacles imperialis*, was reared separately on two plant species. Only plant chloroplast or mitochondrial sequences, reagent contaminants, and the top 10 bacterial genera (among the dissected individuals only) are shown; the remainder of the community (summing to 1) represents sequences from a variety of low-abundance taxa. B) The number of bacterial 16S rRNA gene copies per gram (fresh weight) in homogenized midgut or hindgut tissue and feces (N=5 individuals per species, except *E. imperialis* with 10 individuals (5 each on two plant species)). C) Photographs of each species taken in ACG, Costa Rica.

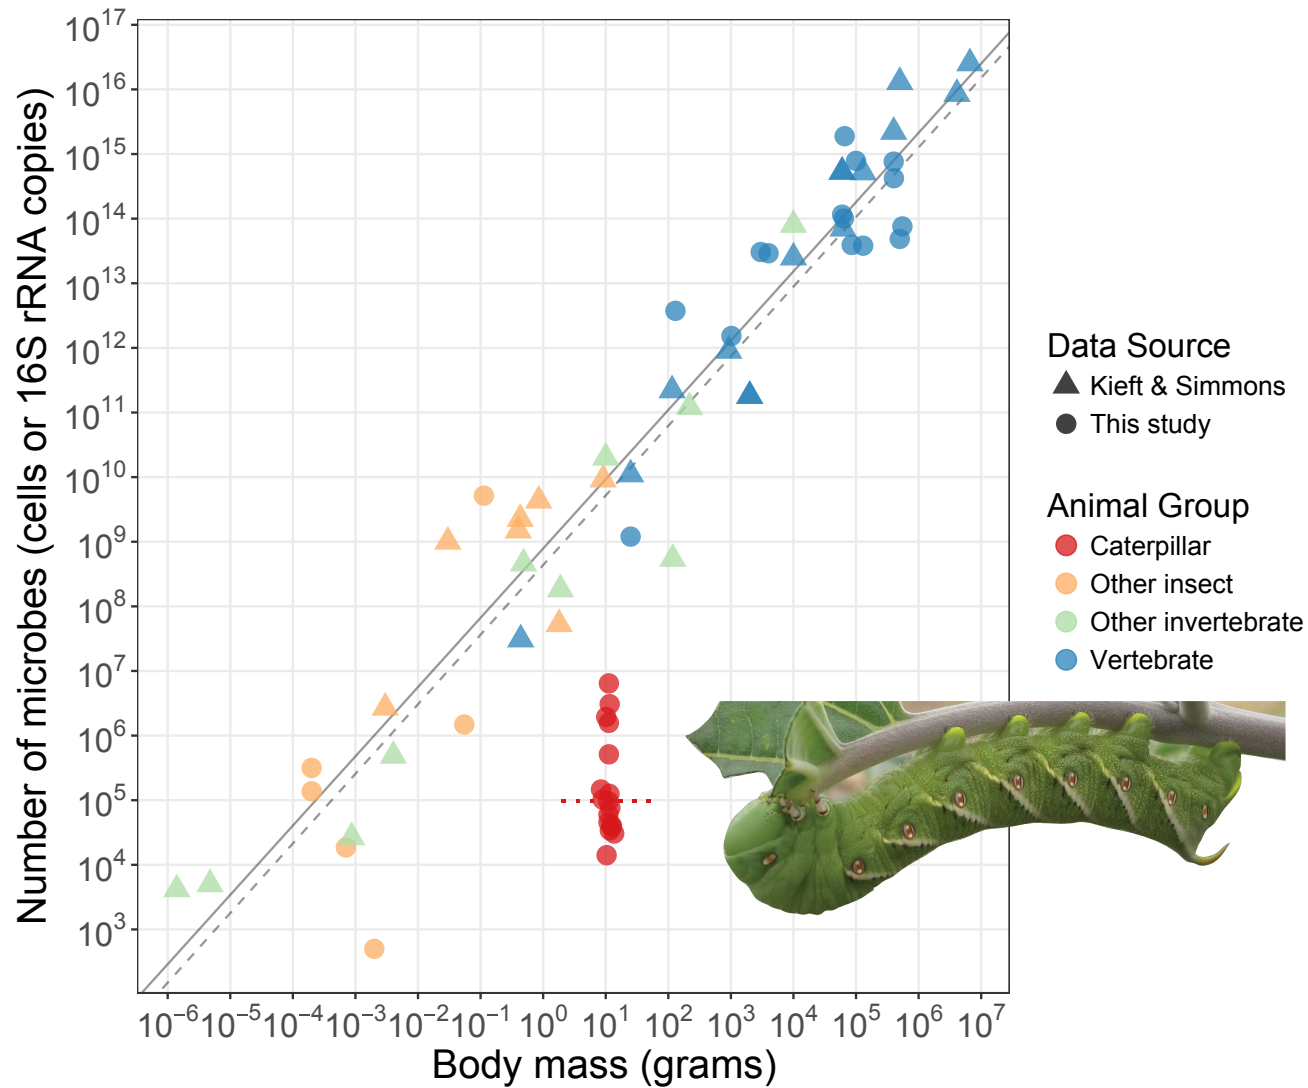

**Figure S3.** Allometric scaling of whole-individual microbial loads with body size. Triangles and the solid line show data replotted from (49), which were originally measured using microscopy or culturing. Circles show data generated in this study, using quantitative PCR. The dashed regression line is calculated from a model only including non-caterpillar species analyzed in this study, limited to those species with bacterial densities not less than 1/100 of the group median. The red horizontal dotted line indicates the median per-caterpillar bacterial load for *Manduca sexta* individuals collected in Colorado (N=15) or Arizona (N=2). The photograph is *M. sexta* feeding on *D. wrightii*.

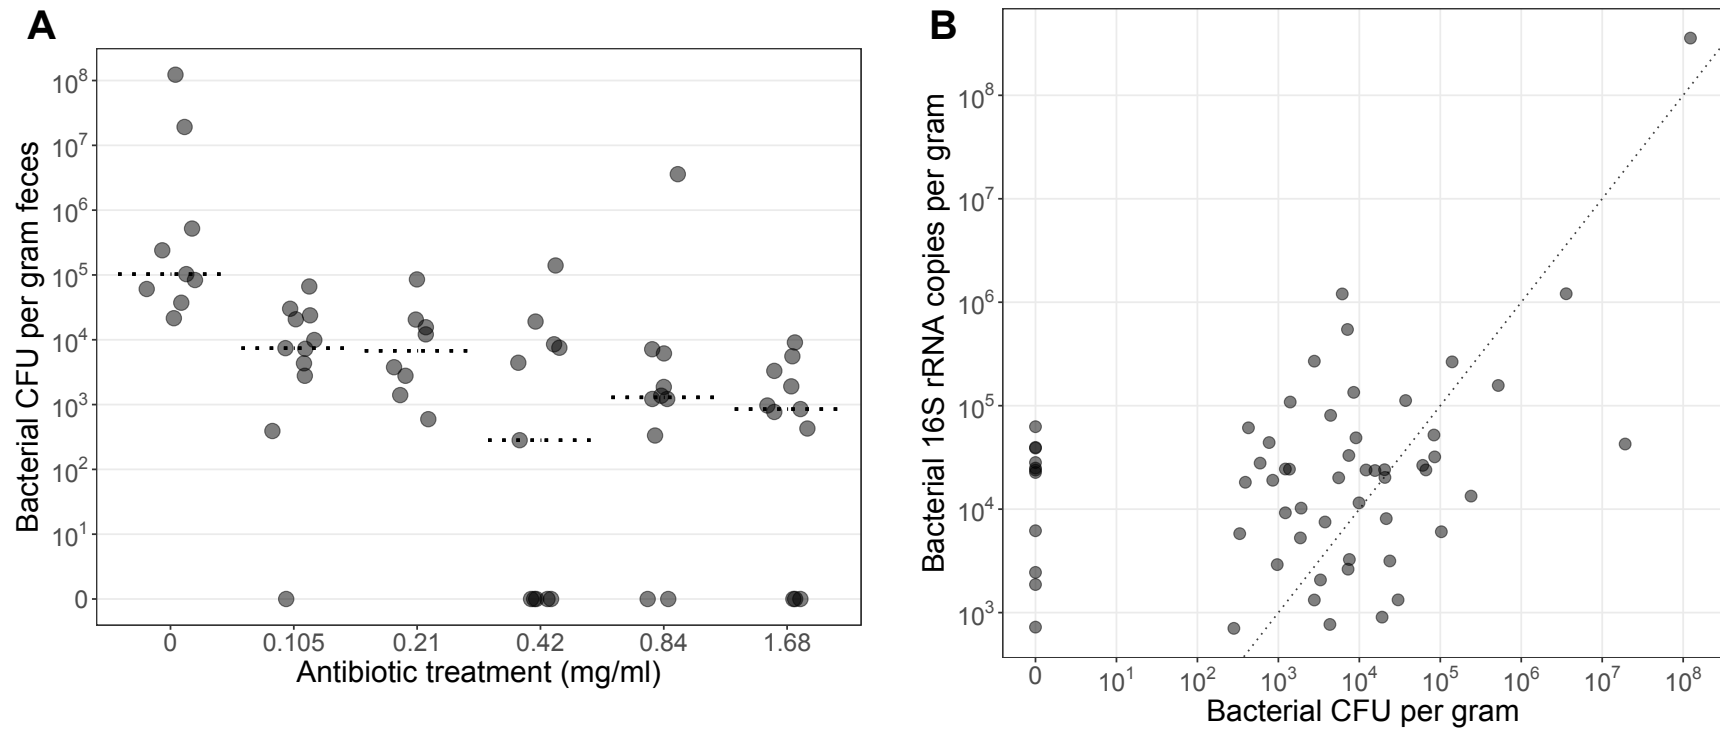

**Figure S4.** The relationships between antibiotic dose, the number of bacterial colony-forming units cultured on LB media, and the number of bacterial 16S rRNA gene copies measured by qPCR. Fecal samples that yielded no cultured colonies are plotted at  $10^0$  on  $\log_{10}$  axes; for these, nonzero estimates of 16S rRNA gene copies are likely due, in large part, to amplification of DNA from dead or nonviable cells (see *SI Methods*). **A)** Effect of antibiotic treatment on the number of culturable bacteria in caterpillar feces. Points are individual caterpillars ( $N=60$ ) and are horizontally jittered for clarity. Dashed lines are medians for each treatment. **B)** Correlation of bacterial density as measured by culturing versus by DNA quantification. The 1:1 line between the two variables is shown.

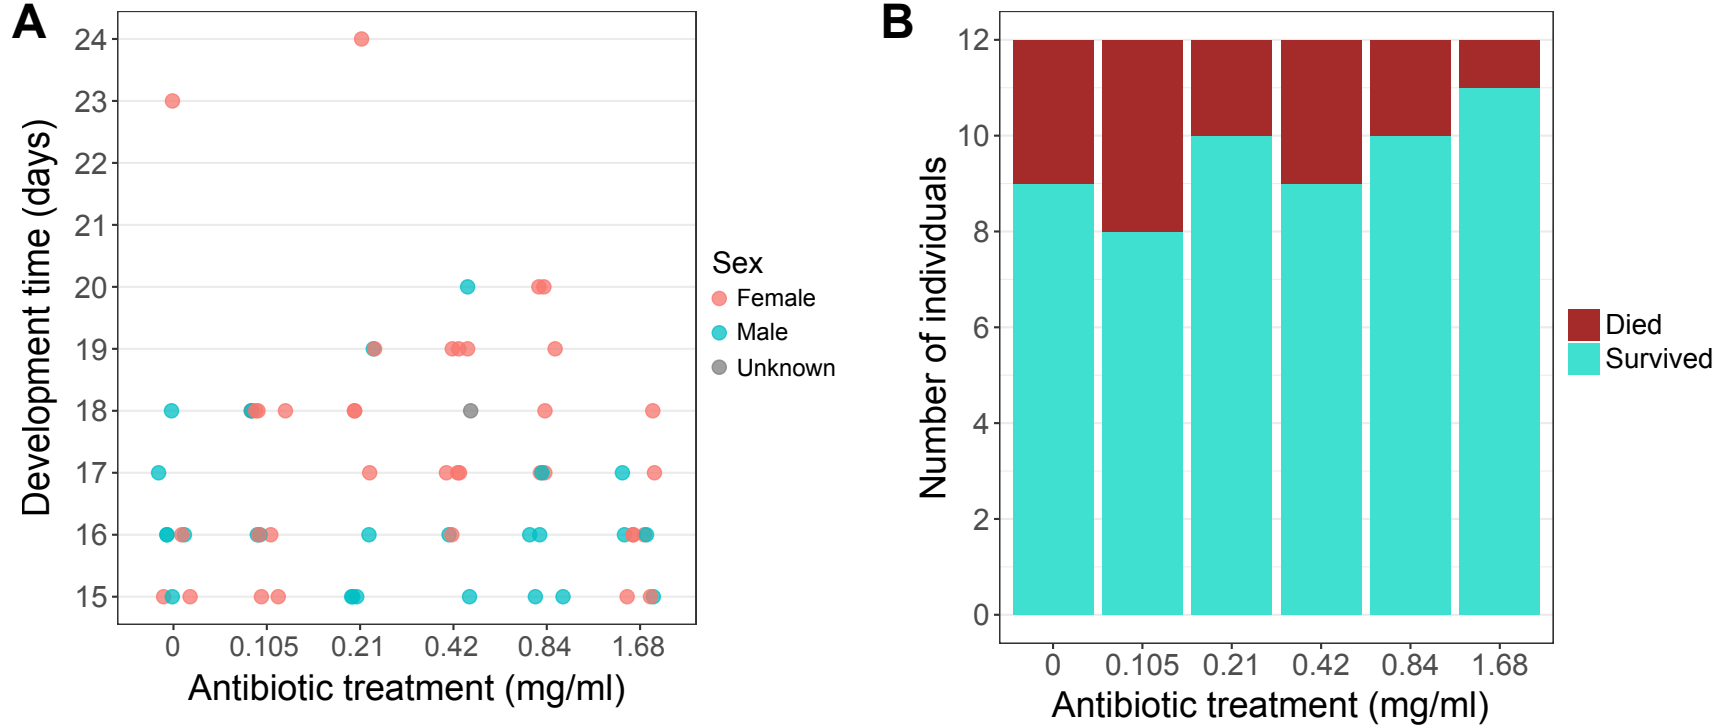

**Figure S5.** The relationship between antibiotic treatment and other components of *M. sexta* fitness. A) Number of days from larval hatching from eggs to the cessation of feeding, which marks the beginning of the prepupal stage. Shown are the 64 individuals that survived to this point. We were unable to identify the sex of two individuals that died as a prepupa or pupa. B) The proportion of individuals surviving from larval hatch to adult eclosion, for the control group and each antibiotic treatment.

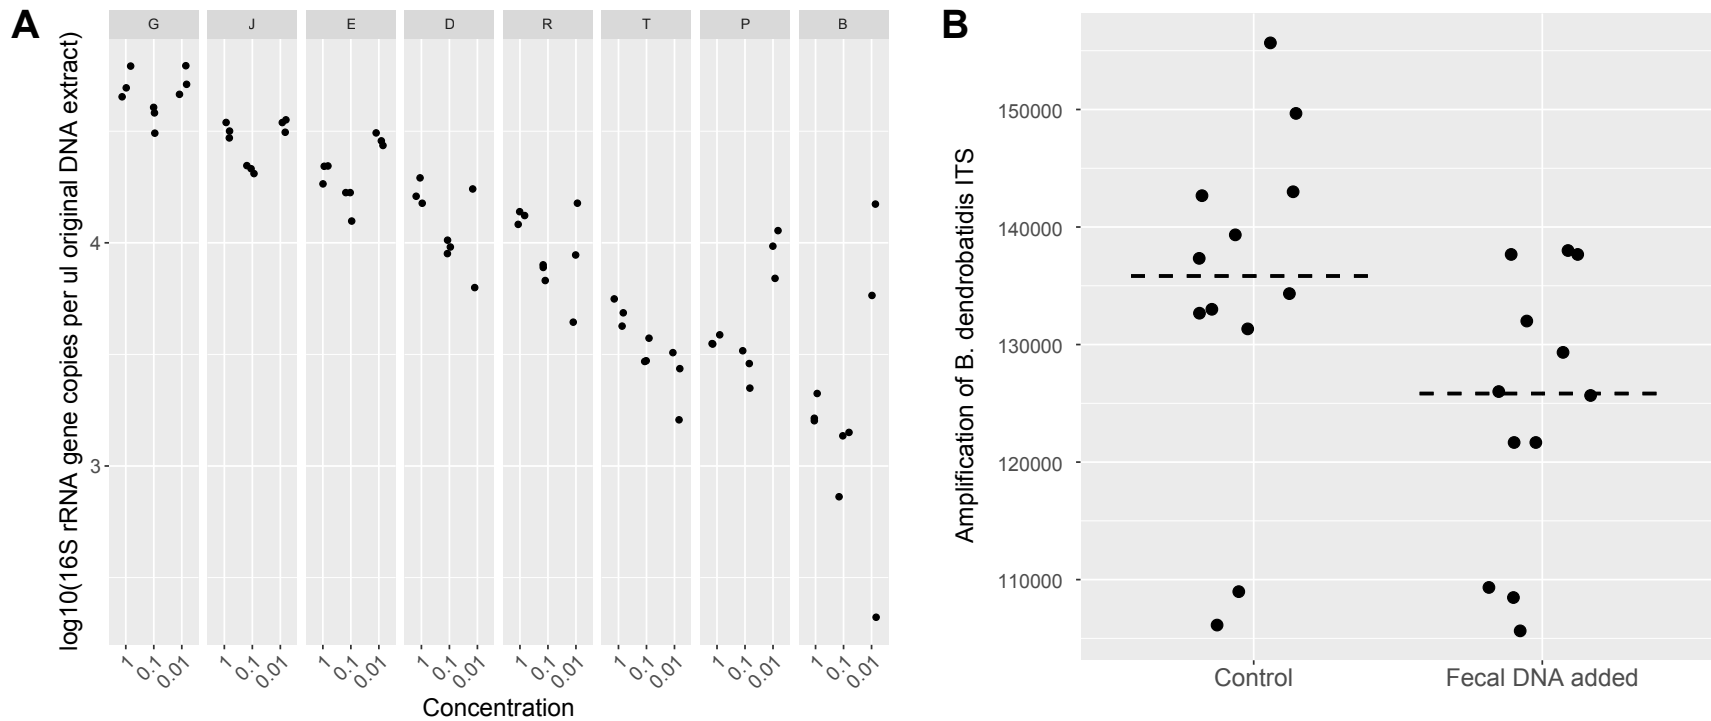

**Figure S6.** Two tests for PCR inhibitory substances in caterpillar feces. A) Fecal DNA from eight *M. sexta* individuals, arranged left-right by decreasing 16S rRNA gene copy number in original extracts. For each individual, log<sub>10</sub>(16S rRNA gene copies) is shown for the original sample, and for and extracts diluted 1:10 and 1:100 in pure water. Copy number estimates are standardized per ul of original DNA extract. Note that variability between technical replicates increases with low concentrations of template DNA. One sample, D-0.01, had less amplification than negative controls and is not shown. B) Amplification (arbitrary units) of rDNA ITS of *B. dendrobatidis*, a chytrid fungus of amphibians, showing 12 replicate controls (PCR-grade water only) versus 12 reactions to which 5 μl of caterpillar fecal DNA was substituted for water. Means of triplicate reactions are shown. The twelve caterpillar species with the lowest total 16S rRNA gene copy number were used for this test. Dashed lines show medians for each group.

## SI Tables

Table S1. Microbial statistics and basic metadata for species included in the study.

| Species                     | Type        | Family      | Group  | Diet      | Sample type | Replicate individuals per species | Bacterial rDNA per g | Fungal rDNA per g | Prop. Plant DNA | Prop. Core |
|-----------------------------|-------------|-------------|--------|-----------|-------------|-----------------------------------|----------------------|-------------------|-----------------|------------|
| <i>Tarchon felderi</i>      | Caterpillar | Bombycidae  | Insect | Herbivore | Fecal       | 1                                 | 4006.17              | 3313.70           | 0.83            | NA         |
| <i>Drepana arcuata</i>      | Caterpillar | Drepanidae  | Insect | Herbivore | Fecal       | 1                                 | 10146.23             | 1084.33           | 0.98            | NA         |
| <i>Pachydota saduca</i>     | Caterpillar | Erebidae    | Insect | Herbivore | Fecal       | 1                                 | 8497.66              | 283.10            | 0.14            | NA         |
| <i>Ophisma tropicalis</i>   | Caterpillar | Erebidae    | Insect | Herbivore | Fecal       | 1                                 | 9752.53              | 121.10            | 0.91            | NA         |
| <i>Hypercompe icasia</i>    | Caterpillar | Erebidae    | Insect | Herbivore | Fecal       | 1                                 | 6362.74              | 457.26            | 0.96            | NA         |
| <i>Pyrrharctia isabella</i> | Caterpillar | Erebidae    | Insect | Herbivore | Fecal       | 1                                 | 33430.51             | 56.81             | 0.64            | NA         |
| <i>Dasychira basiflava</i>  | Caterpillar | Erebidae    | Insect | Herbivore | Fecal       | 1                                 | 117597.62            | 3510.38           | 0.99            | NA         |
| <i>Calyptra canadensis</i>  | Caterpillar | Erebidae    | Insect | Herbivore | Fecal       | 1                                 | 88325.96             | 2189.90           | 0.98            | NA         |
| <i>Melese Espinoza01</i>    | Caterpillar | Erebidae    | Insect | Herbivore | Fecal       | 2                                 | 36701.88             | 3884.78           | 0.53            | NA         |
| <i>Dysschema viuda</i>      | Caterpillar | Erebidae    | Insect | Herbivore | Fecal       | 1                                 | 72459066.45          | 340371.41         | 0.41            | NA         |
| <i>Euchaetes egle</i>       | Caterpillar | Erebidae    | Insect | Herbivore | Fecal       | 1                                 | 22054151.04          | 32617.59          | 0.63            | NA         |
| <i>Diphthera festiva</i>    | Caterpillar | Erebidae    | Insect | Herbivore | Fecal       | 1                                 | 59178.87             | 906.04            | 0.96            | NA         |
| <i>Eutelia furcata</i>      | Caterpillar | Euteliidae  | Insect | Herbivore | Fecal       | 1                                 | 810.62               | 18.20             | 0.33            | NA         |
| <i>Nemoria bistrigaria</i>  | Caterpillar | Geometridae | Insect | Herbivore | Fecal       | 1                                 | 14216.53             | 59.99             | 0.98            | NA         |
| <i>Plagodis serinaria</i>   | Caterpillar | Geometridae | Insect | Herbivore | Fecal       | 1                                 | 8084.20              | 634.05            | 0.99            | NA         |
| <i>Eutrapela clemataria</i> | Caterpillar | Geometridae | Insect | Herbivore | Fecal       | 1                                 | 157782.77            | 372.07            | 0.26            | NA         |
| <i>Tetracis cachexiata</i>  | Caterpillar | Geometridae | Insect | Herbivore | Fecal       | 1                                 | 4948.69              | 78.75             | 0.23            | NA         |

|                                |             |               |        |           |       |   |            |          |      |    |
|--------------------------------|-------------|---------------|--------|-----------|-------|---|------------|----------|------|----|
| <i>Tetracis crocallata</i>     | Caterpillar | Geometridae   | Insect | Herbivore | Fecal | 1 | 2200.31    | 1.89     | 0.93 | NA |
| <i>Lytrosis unitaria</i>       | Caterpillar | Geometridae   | Insect | Herbivore | Fecal | 1 | 201447.66  | 927.73   | 0.07 | NA |
| <i>Selenia alciphearia</i>     | Caterpillar | Geometridae   | Insect | Herbivore | Fecal | 1 | 3542.71    | 11.76    | 0.62 | NA |
| <i>Udranomia kikkawai</i>      | Caterpillar | Hesperiidae   | Insect | Herbivore | Fecal | 1 | 6025.22    | 747.27   | 0.12 | NA |
| <i>Bungalotis quadratum</i>    | Caterpillar | Hesperiidae   | Insect | Herbivore | Fecal | 1 | 5459.42    | 167.10   | 0.39 | NA |
| <i>Epargyreus Burns06</i>      | Caterpillar | Hesperiidae   | Insect | Herbivore | Fecal | 1 | 94146.45   | 2848.23  | 0.26 | NA |
| <i>Polygonus leo</i>           | Caterpillar | Hesperiidae   | Insect | Herbivore | Fecal | 1 | 249671.14  | 19216.34 | 0.95 | NA |
| <i>Narcosius samson</i>        | Caterpillar | Hesperiidae   | Insect | Herbivore | Fecal | 1 | 377412.42  | 7361.54  | 0.31 | NA |
| <i>Phyllodesma americana</i>   | Caterpillar | Lasiocampidae | Insect | Herbivore | Fecal | 1 | 615.86     | 5.98     | 0.96 | NA |
| <i>Malacosoma disstria</i>     | Caterpillar | Lasiocampidae | Insect | Herbivore | Fecal | 1 | 11821.39   | 97.70    | 0.97 | NA |
| <i>Tolype vellea</i>           | Caterpillar | Lasiocampidae | Insect | Herbivore | Fecal | 1 | 923.88     | 0.00     | 0.52 | NA |
| <i>Malacosoma americanum</i>   | Caterpillar | Lasiocampidae | Insect | Herbivore | Fecal | 1 | 281308.04  | 40186.86 | 1.00 | NA |
| <i>Acharia stimulea</i>        | Caterpillar | Limacodidae   | Insect | Herbivore | Fecal | 1 | 15174.26   | 10296.82 | 0.99 | NA |
| <i>Tortricidia pallida</i>     | Caterpillar | Limacodidae   | Insect | Herbivore | Fecal | 1 | 1474.93    | 3049.52  | 0.97 | NA |
| <i>Euclea delphinii</i>        | Caterpillar | Limacodidae   | Insect | Herbivore | Fecal | 1 | 80879.30   | 77883.77 | 0.95 | NA |
| <i>Isa textula</i>             | Caterpillar | Limacodidae   | Insect | Herbivore | Fecal | 1 | 440.91     | 0.00     | 0.99 | NA |
| <i>Satyrium liparops</i>       | Caterpillar | Lycaenidae    | Insect | Herbivore | Fecal | 1 | 13999.94   | 549.02   | 1.00 | NA |
| <i>Pseudbarydia crespula</i>   | Caterpillar | Noctuidae     | Insect | Herbivore | Fecal | 1 | 3923249.45 | 2906.99  | 0.04 | NA |
| <i>Spragueia lepus</i>         | Caterpillar | Noctuidae     | Insect | Herbivore | Fecal | 1 | 2982.20    | 110.80   | 0.19 | NA |
| <i>Panthea acronyctoides</i>   | Caterpillar | Noctuidae     | Insect | Herbivore | Fecal | 1 | 5590.63    | 2907.54  | 0.23 | NA |
| <i>Euscirrhopterus poeyi</i>   | Caterpillar | Noctuidae     | Insect | Herbivore | Fecal | 1 | 17626.52   | 3130.87  | 0.79 | NA |
| <i>Lithophane baileyi</i>      | Caterpillar | Noctuidae     | Insect | Herbivore | Fecal | 1 | 5862.53    | 22.55    | 0.97 | NA |
| <i>Harrisimemna trisignata</i> | Caterpillar | Noctuidae     | Insect | Herbivore | Fecal | 1 | 13192.59   | 5157.60  | 0.98 | NA |



|                                 |             |              |        |           |       |   |            |           |      |    |
|---------------------------------|-------------|--------------|--------|-----------|-------|---|------------|-----------|------|----|
| <i>Orthosia alurina</i>         | Caterpillar | Noctuidae    | Insect | Herbivore | Fecal | 1 | 52211.88   | 0.00      | 0.99 | NA |
| <i>Copivaleria grotei</i>       | Caterpillar | Noctuidae    | Insect | Herbivore | Fecal | 1 | 2409212.79 | 4333.12   | 0.97 | NA |
| <i>Catocala cara</i>            | Caterpillar | Noctuidae    | Insect | Herbivore | Fecal | 1 | 71.13      | 0.58      | 0.50 | NA |
| <i>Spodoptera latifascia</i>    | Caterpillar | Noctuidae    | Insect | Herbivore | Fecal | 2 | 9145.14    | 93.52     | 0.49 | NA |
| <i>Lithophane hemina</i>        | Caterpillar | Noctuidae    | Insect | Herbivore | Fecal | 1 | 2872202.73 | 3346.44   | 0.69 | NA |
| <i>Orthosia rubescens</i>       | Caterpillar | Noctuidae    | Insect | Herbivore | Fecal | 1 | 205996.07  | 9716.80   | 0.99 | NA |
| <i>Eudryas grata</i>            | Caterpillar | Noctuidae    | Insect | Herbivore | Fecal | 1 | 1330.47    | 0.00      | 0.01 | NA |
| <i>Gonodonta unknownspecies</i> | Caterpillar | Noctuidae    | Insect | Herbivore | Fecal | 1 | 0.00       | 0.00      | 0.30 | NA |
| <i>Catocala epione</i>          | Caterpillar | Noctuidae    | Insect | Herbivore | Fecal | 1 | 85409.54   | 0.00      | 0.99 | NA |
| <i>Acronicta americana</i>      | Caterpillar | Noctuidae    | Insect | Herbivore | Fecal | 1 | 3360.63    | 88.22     | 0.94 | NA |
| <i>Panthea furcilla</i>         | Caterpillar | Noctuidae    | Insect | Herbivore | Fecal | 1 | 800.16     | 0.00      | 0.13 | NA |
| <i>Lithophane grotei</i>        | Caterpillar | Noctuidae    | Insect | Herbivore | Fecal | 1 | 229782.01  | 1337.89   | 0.90 | NA |
| <i>Feralia jocosa</i>           | Caterpillar | Noctuidae    | Insect | Herbivore | Fecal | 1 | 140932.68  | 22278.88  | 0.94 | NA |
| <i>Cucullia convexipennis</i>   | Caterpillar | Noctuidae    | Insect | Herbivore | Fecal | 1 | 6215.24    | 248.61    | 0.99 | NA |
| <i>Lithophane antennata</i>     | Caterpillar | Noctuidae    | Insect | Herbivore | Fecal | 1 | 22275.94   | 150.51    | 0.97 | NA |
| <i>Xylena curvimacula</i>       | Caterpillar | Noctuidae    | Insect | Herbivore | Fecal | 1 | 931.63     | 0.00      | 0.97 | NA |
| <i>Acronicta lepusculina</i>    | Caterpillar | Noctuidae    | Insect | Herbivore | Fecal | 1 | 8415.05    | 291.99    | 0.79 | NA |
| <i>Nystalea ebalea</i>          | Caterpillar | Notodontidae | Insect | Herbivore | Fecal | 1 | 886.24     | 96.05     | 0.52 | NA |
| <i>Rifargia felderi</i>         | Caterpillar | Notodontidae | Insect | Herbivore | Fecal | 1 | 641388.03  | 161600.81 | 0.96 | NA |
| <i>Sericochroa Janzen01</i>     | Caterpillar | Notodontidae | Insect | Herbivore | Fecal | 1 | 676325.13  | 49855.09  | 0.18 | NA |
| <i>Furcula borealis</i>         | Caterpillar | Notodontidae | Insect | Herbivore | Fecal | 1 | 18300.71   | 0.00      | 0.99 | NA |
| <i>Dasylophia thyatiroides</i>  | Caterpillar | Notodontidae | Insect | Herbivore | Fecal | 1 | 58873.76   | 3158.65   | 0.96 | NA |
| <i>Cecrita probaDHJ04</i>       | Caterpillar | Notodontidae | Insect | Herbivore | Fecal | 1 | 36027.44   | 1351.87   | 0.40 | NA |

|                                  |             |              |        |           |       |   |             |            |      |    |
|----------------------------------|-------------|--------------|--------|-----------|-------|---|-------------|------------|------|----|
| <i>Schizura concinna</i>         | Caterpillar | Notodontidae | Insect | Herbivore | Fecal | 1 | 544.01      | 0.00       | 0.91 | NA |
| <i>Notodonta torva</i>           | Caterpillar | Notodontidae | Insect | Herbivore | Fecal | 1 | 3385.37     | 0.00       | 0.71 | NA |
| <i>Pheosia rimosa</i>            | Caterpillar | Notodontidae | Insect | Herbivore | Fecal | 1 | 3901.59     | 0.00       | 0.67 | NA |
| <i>Nystalea squamosa</i>         | Caterpillar | Notodontidae | Insect | Herbivore | Fecal | 1 | 1227.42     | 30.47      | 0.28 | NA |
| <i>Crinodes besckei</i>          | Caterpillar | Notodontidae | Insect | Herbivore | Fecal | 1 | 137343.03   | 55371.50   | 0.99 | NA |
| <i>Symmerista sp</i>             | Caterpillar | Notodontidae | Insect | Herbivore | Fecal | 1 | 4212.32     | 28.30      | 0.93 | NA |
| <i>Hemiceras nigrescens</i>      | Caterpillar | Notodontidae | Insect | Herbivore | Fecal | 1 | 1430.33     | 51.84      | 0.95 | NA |
| <i>Nymphalis antiopa</i>         | Caterpillar | Nymphalidae  | Insect | Herbivore | Fecal | 1 | 601.08      | 0.00       | 0.27 | NA |
| <i>Polygonia interrogationis</i> | Caterpillar | Nymphalidae  | Insect | Herbivore | Fecal | 2 | 12245.63    | 1284.86    | 0.98 | NA |
| <i>Archaeoprepona demophoon</i>  | Caterpillar | Nymphalidae  | Insect | Herbivore | Fecal | 1 | 90460.15    | 6000.60    | 0.88 | NA |
| <i>Antirrhea lindigii</i>        | Caterpillar | Nymphalidae  | Insect | Herbivore | Fecal | 1 | 16759.35    | 121.96     | 0.19 | NA |
| <i>Danaus plexippus</i>          | Caterpillar | Nymphalidae  | Insect | Herbivore | Fecal | 1 | 529404.79   | 71541.19   | 0.95 | NA |
| <i>Catonephele numilia</i>       | Caterpillar | Nymphalidae  | Insect | Herbivore | Fecal | 1 | 6408679.22  | 5158461.47 | 0.03 | NA |
| <i>Caligo atreus</i>             | Caterpillar | Nymphalidae  | Insect | Herbivore | Fecal | 2 | 139516.96   | 691.36     | 0.29 | NA |
| <i>Memphis proserpina</i>        | Caterpillar | Nymphalidae  | Insect | Herbivore | Fecal | 1 | 112625.74   | 15737.27   | 0.68 | NA |
| <i>Archaeoprepona camilla</i>    | Caterpillar | Nymphalidae  | Insect | Herbivore | Fecal | 1 | 37516.03    | 1754.57    | 0.36 | NA |
| <i>Morpho amathonte</i>          | Caterpillar | Nymphalidae  | Insect | Herbivore | Fecal | 1 | 14123.86    | 268.49     | 0.22 | NA |
| <i>Morpho catalina</i>           | Caterpillar | Nymphalidae  | Insect | Herbivore | Fecal | 1 | 60979.21    | 1520.17    | 0.47 | NA |
| <i>Taygetis rufomarginata</i>    | Caterpillar | Nymphalidae  | Insect | Herbivore | Fecal | 1 | 16338612.30 | 5941.10    | 0.11 | NA |
| <i>Morpho granadensis</i>        | Caterpillar | Nymphalidae  | Insect | Herbivore | Fecal | 1 | 2415575.47  | 5258.48    | 0.04 | NA |
| <i>Papilio glaucus</i>           | Caterpillar | Papilionidae | Insect | Herbivore | Fecal | 1 | 929.15      | 272.79     | 0.95 | NA |
| <i>Pterourus bryki</i>           | Caterpillar | Papilionidae | Insect | Herbivore | Fecal | 2 | 1209928.18  | 11553.19   | 0.08 | NA |
| <i>Papilio troilus</i>           | Caterpillar | Papilionidae | Insect | Herbivore | Fecal | 1 | 473.20      | 28.35      | 0.89 | NA |

|                                  |             |             |        |           |       |    |            |          |      |      |
|----------------------------------|-------------|-------------|--------|-----------|-------|----|------------|----------|------|------|
| <i>Citheronia lobesis</i>        | Caterpillar | Saturniidae | Insect | Herbivore | Fecal | 5  | 2057.27    | 0.74     | 0.08 | 0.58 |
| <i>Eacles imperialis</i>         | Caterpillar | Saturniidae | Insect | Herbivore | Fecal | 16 | 5346.08    | 89.17    | 0.98 | 0.60 |
| <i>Rothschildia lebeau</i>       | Caterpillar | Saturniidae | Insect | Herbivore | Fecal | 5  | 1652.27    | 0.00     | 0.07 | 0.52 |
| <i>Schausiella santarosensis</i> | Caterpillar | Saturniidae | Insect | Herbivore | Fecal | 5  | 36835.67   | 362.21   | 0.97 | 0.70 |
| <i>Syssphinx colla</i>           | Caterpillar | Saturniidae | Insect | Herbivore | Fecal | 5  | 25000.37   | 6217.02  | 0.98 | 0.40 |
| <i>Titaea tamerlan</i>           | Caterpillar | Saturniidae | Insect | Herbivore | Fecal | 5  | 6663.49    | 90.05    | 0.99 | 0.35 |
| <i>Antheraea polyphemus</i>      | Caterpillar | Saturniidae | Insect | Herbivore | Fecal | 1  | 7630.89    | 0.00     | 0.97 | NA   |
| <i>Automeris postalbida</i>      | Caterpillar | Saturniidae | Insect | Herbivore | Fecal | 1  | 114148.96  | 3190.42  | 0.04 | NA   |
| <i>Citheronia regalis</i>        | Caterpillar | Saturniidae | Insect | Herbivore | Fecal | 1  | 4283.77    | 3157.75  | 0.98 | NA   |
| <i>Hemileuca lucina</i>          | Caterpillar | Saturniidae | Insect | Herbivore | Fecal | 1  | 57692.21   | 945.77   | 1.00 | NA   |
| <i>Anisota virginiensis</i>      | Caterpillar | Saturniidae | Insect | Herbivore | Fecal | 1  | 3039.32    | 23.74    | 0.98 | NA   |
| <i>Adeloneivaia jason</i>        | Caterpillar | Saturniidae | Insect | Herbivore | Fecal | 1  | 416249.53  | 14130.65 | 0.59 | NA   |
| <i>Hylesia continua</i>          | Caterpillar | Saturniidae | Insect | Herbivore | Fecal | 1  | 320113.93  | 5680.18  | 0.18 | NA   |
| <i>Callosamia promethea</i>      | Caterpillar | Saturniidae | Insect | Herbivore | Fecal | 1  | 1327.54    | 131.81   | 0.99 | NA   |
| <i>Actias luna</i>               | Caterpillar | Saturniidae | Insect | Herbivore | Fecal | 1  | 37319.84   | 0.00     | 1.00 | NA   |
| <i>Copaxa rufinans</i>           | Caterpillar | Saturniidae | Insect | Herbivore | Fecal | 1  | 87530.01   | 24309.40 | 0.47 | NA   |
| <i>Sphingicampa bisecta</i>      | Caterpillar | Saturniidae | Insect | Herbivore | Fecal | 1  | 3538.19    | 491.41   | 0.31 | NA   |
| <i>Callosamia angulifera</i>     | Caterpillar | Saturniidae | Insect | Herbivore | Fecal | 1  | 1769393.41 | 18566.11 | 0.76 | NA   |
| <i>Oxytenis beprea</i>           | Caterpillar | Saturniidae | Insect | Herbivore | Fecal | 1  | 43077.75   | 1271.71  | 0.29 | NA   |
| <i>Hyalophora cecropia</i>       | Caterpillar | Saturniidae | Insect | Herbivore | Fecal | 1  | 5030260.25 | 9463.59  | 0.51 | NA   |
| <i>Manduca sexta</i>             | Caterpillar | Sphingidae  | Insect | Herbivore | Fecal | 18 | 9847.13    | 127.92   | 0.95 | 0.30 |
| <i>Aellopos titan</i>            | Caterpillar | Sphingidae  | Insect | Herbivore | Fecal | 4  | 312675.68  | 6439.52  | 1.00 | NA   |
| <i>Unzela japix</i>              | Caterpillar | Sphingidae  | Insect | Herbivore | Fecal | 1  | 351.81     | 16.90    | 0.90 | NA   |
| <i>Lapara bombycoides</i>        | Caterpillar | Sphingidae  | Insect | Herbivore | Fecal | 1  | 676.87     | 71.68    | 0.79 | NA   |

|                                  |              |            |        |           |                         |   |                |             |      |      |
|----------------------------------|--------------|------------|--------|-----------|-------------------------|---|----------------|-------------|------|------|
| <i>Nyceryx tacita</i>            | Caterpillar  | Sphingidae | Insect | Herbivore | Fecal                   | 1 | 25549.44       | 1626.02     | 0.57 | NA   |
| <i>Ceratomia undulosa</i>        | Caterpillar  | Sphingidae | Insect | Herbivore | Fecal                   | 1 | 5090.77        | 445.87      | 0.81 | NA   |
| <i>Aellopos fadus</i>            | Caterpillar  | Sphingidae | Insect | Herbivore | Fecal                   | 2 | 5935.51        | 3528.85     | 0.98 | NA   |
| <i>Eumorpha achemon</i>          | Caterpillar  | Sphingidae | Insect | Herbivore | Fecal                   | 1 | 2078.38        | 0.00        | 0.09 | NA   |
| <i>Sphinx poecila</i>            | Caterpillar  | Sphingidae | Insect | Herbivore | Fecal                   | 1 | 0.00           | 0.00        | 0.00 | NA   |
| <i>Ceratomia amyntor</i>         | Caterpillar  | Sphingidae | Insect | Herbivore | Fecal                   | 1 | 79295.79       | 1174.75     | 0.94 | NA   |
| <i>Hemaris diffinis</i>          | Caterpillar  | Sphingidae | Insect | Herbivore | Fecal                   | 1 | 986309.61      | 659654.01   | 0.80 | NA   |
| <i>Erinnyis crameri</i>          | Caterpillar  | Sphingidae | Insect | Herbivore | Fecal                   | 1 | 806923.46      | 9066.56     | 0.99 | NA   |
| <i>Perigonia ilus</i>            | Caterpillar  | Sphingidae | Insect | Herbivore | Fecal                   | 1 | 6710.32        | 166.90      | 0.50 | NA   |
| <i>Xylophanes loelia</i>         | Caterpillar  | Sphingidae | Insect | Herbivore | Fecal                   | 1 | 54084.35       | 610.44      | 0.05 | NA   |
| <i>Amphonyx duponchel</i>        | Caterpillar  | Sphingidae | Insect | Herbivore | Fecal                   | 1 | 29325.85       | 7618.17     | 0.97 | NA   |
| <i>Unzela pronoe</i>             | Caterpillar  | Sphingidae | Insect | Herbivore | Fecal                   | 1 | 380.74         | 54.29       | 0.96 | NA   |
| <i>Sphinx kalmiae</i>            | Caterpillar  | Sphingidae | Insect | Herbivore | Fecal                   | 1 | 15495.27       | 1981.95     | 0.99 | NA   |
| <i>Branta bernicla nigricans</i> | Other animal | Other      | Bird   | Herbivore | Fecal                   | 3 | 518382.97      | 4983.42     | 0.48 | 0.95 |
| <i>Aphodius pedellus</i>         | Other animal | Other      | Insect | Dung      | Whole body (homogenate) | 3 | 45689675894.29 | 20911404.35 | 0.00 | 0.94 |
| <i>Apis mellifera</i>            | Other animal | Other      | Insect | Herbivore | Whole body (homogenate) | 6 | 28807184.26    | 0.00        | 0.01 | 1.00 |
| <i>Tamalia coweni</i>            | Other animal | Other      | Insect | Herbivore | Whole body (homogenate) | 3 | 1578929729.82  | 90537.48    | 0.00 | 1.00 |
| <i>Tamalia inquilinus</i>        | Other animal | Other      | Insect | Herbivore | Whole body (homogenate) | 3 | 687978120.71   | 624186.28   | 0.00 | 1.00 |
| <i>Geotrupes stercorosus</i>     | Other animal | Other      | Insect | Dung      | Whole body (homogenate) | 2 | 2851028.70     | 14836.51    | 0.00 | NA   |
| <i>Pseudomyrmex spinicola</i>    | Other animal | Other      | Insect | Herbivore | Whole body (homogenate) | 1 | 12524618.61    | 99309.25    | 0.01 | NA   |
| <i>Macrosiphum euphorbiae</i>    | Other animal | Other      | Insect | Herbivore | Whole body (homogenate) | 1 | 633845944.81   | 0.00        | 0.01 | NA   |
| <i>Bison bison</i>               | Other animal | Other      | Mammal | Herbivore | Fecal                   | 3 | 137539946.03   | 0.00        | 0.00 | 0.95 |
| <i>Bos taurus</i>                | Other animal | Other      | Mammal | Herbivore | Fecal                   | 3 | 1907811339.05  | 17566372.08 | 0.00 | 0.99 |

|                               |              |       |        |             |       |   |                |              |      |      |
|-------------------------------|--------------|-------|--------|-------------|-------|---|----------------|--------------|------|------|
| <i>Capra hircus</i>           | Other animal | Other | Mammal | Herbivore   | Fecal | 3 | 1922339809.30  | 5329055.19   | 0.00 | 0.97 |
| <i>Cercopithecus ascanius</i> | Other animal | Other | Mammal | Omnivore    | Fecal | 3 | 10102019566.73 | 408997.09    | 0.00 | 0.94 |
| <i>Cercopithecus mitis</i>    | Other animal | Other | Mammal | Omnivore    | Fecal | 3 | 6620159251.40  | 0.00         | 0.00 | 0.95 |
| <i>Equus caballus</i>         | Other animal | Other | Mammal | Herbivore   | Fecal | 3 | 97169889.91    | 31087798.43  | 0.00 | 0.89 |
| <i>Mus musculus</i>           | Other animal | Other | Mammal | Herbivore   | Fecal | 3 | 47987023.24    | 44935.59     | 0.00 | 0.89 |
| <i>Myotis lucifugus</i>       | Other animal | Other | Mammal | Insectivore | Fecal | 3 | 668425.17      | 32665.36     | 0.15 | 0.89 |
| <i>Neotoma lepida</i>         | Other animal | Other | Mammal | Herbivore   | Fecal | 3 | 28816733387.87 | 2505713.07   | 0.00 | 0.91 |
| <i>Odocoileus virginianus</i> | Other animal | Other | Mammal | Herbivore   | Fecal | 3 | 460167255.40   | 315910782.40 | 0.00 | 0.90 |
| <i>Ovis dalli</i>             | Other animal | Other | Mammal | Herbivore   | Fecal | 3 | 1567164071.09  | 10278456.07  | 0.00 | 0.97 |
| <i>Rangifer tarandus</i>      | Other animal | Other | Mammal | Herbivore   | Fecal | 3 | 7838726610.14  | 68135.34     | 0.00 | 0.99 |
| <i>Sus scrofa</i>             | Other animal | Other | Mammal | Omnivore    | Fecal | 7 | 293518641.49   | 84175.96     | 0.01 | 0.95 |
| <i>Sylvilagus nuttallii</i>   | Other animal | Other | Mammal | Herbivore   | Fecal | 3 | 1497616430.42  | 130260411.03 | 0.00 | 0.98 |
| <i>Alces alces</i>            | Other animal | Other | Mammal | Herbivore   | Fecal | 2 | 1048643100.98  | 56134.09     | 0.00 | NA   |
| <i>Homo sapiens</i>           | Other animal | Other | Mammal | Omnivore    | Fecal | 1 | 28723208492.57 | 735549.51    | 0.00 | NA   |

**Table S2.** The taxonomy and distribution of the 10 most-common bacterial phylotypes in caterpillar feces.

| Phylotype | Phylum         | Family              | Genus                   | Prop. samples detected in | Median rRNA copies per gram when present | Among top 10 plant phylotypes? | Top BLAST hits to named isolates                              | Highest seq. identity |
|-----------|----------------|---------------------|-------------------------|---------------------------|------------------------------------------|--------------------------------|---------------------------------------------------------------|-----------------------|
| OTU_19    | Firmicutes     | Staphylococcaceae   | <i>Staphylococcus</i>   | 0.79                      | 280                                      | No                             | <i>Staphylococcus</i>                                         | 100%                  |
| OTU_23    | Proteobacteria | Enterobacteriaceae  | <i>Escherichia</i>      | 0.73                      | 132                                      | Yes                            | <i>Escherichia coli</i>                                       | 100%                  |
| OTU_11    | Proteobacteria | Methylobacteriaceae | <i>Methylobacterium</i> | 0.72                      | 692                                      | Yes                            | <i>Methylobacterium</i>                                       | 100%                  |
| OTU_2     | Proteobacteria | Enterobacteriaceae  | <i>Klebsiella</i>       | 0.65                      | 202                                      | Yes                            | <i>Klebsiella</i> ,<br><i>Enterobacter</i> ,<br><i>others</i> | 100%                  |
| OTU_5     | Firmicutes     | Enterococcaceae     | <i>Enterococcus</i>     | 0.65                      | 109                                      | Yes                            | <i>Enterococcus</i>                                           | 100%                  |
| OTU_79    | Proteobacteria | Sphingomonadaceae   | <i>Sphingomonas</i>     | 0.54                      | 155                                      | Yes                            | <i>Sphingomonas</i>                                           | 100%                  |
| OTU_8     | Firmicutes     | Lachnospiraceae     | <i>Clostridium</i>      | 0.49                      | 40                                       | Yes                            | <i>Clostridium</i>                                            | 93%                   |
| OTU_16    | Proteobacteria | Moraxellaceae       | <i>Acinetobacter</i>    | 0.44                      | 86                                       | No                             | <i>Acinetobacter</i>                                          | 100%                  |
| OTU_160   | Actinobacteria | Corynebacteriaceae  | <i>Corynebacterium</i>  | 0.42                      | 108                                      | No                             | <i>Corynebacterium</i>                                        | 100%                  |
| OTU_36    | Actinobacteria | Microbacteriaceae   | unclassified            | 0.42                      | 141                                      | Yes                            | <i>Curtobacterium</i> ,<br><i>Flavobacterium</i>              | 100%                  |

The taxonomic classification from Greengenes is given in columns 2-4. For each phylotype, the median absolute abundance was calculated only including samples in which it was present. We also indicate whether each phylotype was one of the 10 most common among all leaf samples. The representative sequence was used in a BLAST search against the NCBI database, restricted to named bacterial isolates, and the sequence identity and genus-level classification of the top hit(s) are shown.

## SI Methods

### *Sampling*

Fecal samples were obtained from wild populations of caterpillars in four regions: Área de Conservación Guanacaste (Costa Rica), New Hampshire and Massachusetts (USA), Boulder County, Colorado (USA), and Portal, Arizona (USA). Caterpillars were collected in ACG under permit #ACG-PI-027-2015 and in Arizona under a Scientific Use Permit from the United States Forest Service. For more details about the ACG landscape and collection, rearing, and identification protocols, see (3-5). Most species were collected as caterpillars, but some ACG specimens were reared from eggs either found on foliage or laid by females caught at light traps (see file “Additional\_ACG\_SampleData”; all files are downloadable from the figshare repository linked in the main text). For some caterpillars we had information on whether they died of parasitoids or disease after sampling, and these samples were discarded in order to focus on apparently healthy individuals. Most caterpillars were sampled in the final or penultimate instar.

All samples were preserved within 30 minutes of defecation, as preliminary evidence suggested rapid (by 6-12 hours) bacterial and fungal growth in excreted fecal pellets, which would render old feces unsuitable as a proxy for gut microbial communities. In five caterpillar species, we did not find evidence for abundant bacterial populations in the midgut (including both ecto- and endoperitrophic spaces) or hindgut that were not captured in feces (Fig. S2A), supporting a previous finding that caterpillar feces approximates the whole-body microbial community (6). Further supporting the use of fresh feces to sample microbes in the caterpillar gut, we found that the inter-individual variation in sequence composition (including nonbacterial DNA) was reflected in fecal samples (Mantel tests: midgut  $r = 0.33$ ,  $p = 0.001$ ; hindgut  $r = 0.39$ ,  $p = 0.001$ ).

We preserved gut and fecal samples using either dry storage at  $-20^{\circ}\text{C}$  or 95% ethanol (see file “SampleData”); both methods are suitable for storing insect microbiome samples and do not substantially alter community composition (7). Approximately 50 mg (fresh weight) of sample was used for DNA extraction. Prior to DNA extraction, ethanol-preserved samples were dried in a vacuum centrifuge; since this also evaporated water, their fresh weight equivalent was estimated using percent water content calculated from *M. sexta* guts or feces. To test whether microbial biomass estimates may have been biased by ethanol storage, we compared PCR amplification for paired ethanol-stored and frozen fecal pellets from eight *M. sexta* individuals. From a collection of pellets defecated by each individual during a 1-2 hour window, separate pellets were randomly chosen for each storage type (note that pre-storage inter-pellet microbial variation is possible even under these relatively controlled conditions). As assessed by a linear mixed-effects model treating individual as a random effect, there was no significant influence of storage method on 16S rRNA gene copy number ( $\chi^2(1) = 1.09$ ,  $p = 0.30$ ).

For caterpillars in Costa Rica and Colorado, we also sampled microbes from leaves of the same branch as that fed to the caterpillar prior to feces collection. With this strategy we aimed to maximize microbial similarity between the leaves that were sampled and those consumed by the caterpillar, although leaf microbiomes can also vary substantially within a branch (8). These leaves appeared clean and had not, to our knowledge, come into contact with any caterpillars prior to sampling. Leaves from Colorado

plants were frozen dry at -20°C and ground under liquid N<sub>2</sub> with a mortar and pestle prior to DNA extraction (thus including endophytes as well as surface-associated microbes). Leaves from Costa Rican plants were stored in 95% ethanol, and surface-associated microbes were concentrated in a vacuum centrifuge and resuspended in molecular grade water prior to DNA extraction. As this sampling method was not quantitative, we did not perform qPCR on plant samples from Costa Rica and used them only for analyses of microbial composition.

Non-lepidopteran animals were sampled using the same procedures outlined above, with five species preserved in ethanol, two in 15% glycerol at -80°C, and 17 preserved dry at -20°C or -80°C (see file “Other\_animal\_Metadata”). With the exception of two dung beetles feeding on herbivore dung, and the insectivorous bat *M. lucifugus*, these species are either predominantly or exclusively herbivorous, although the type of plant matter consumed (sap, leaves, seeds, fruit, pollen, etc.) varies. We extracted DNA from feces for vertebrates and from subsamples of homogenized whole bodies for insects (as some insects house the majority of symbionts in organs outside the gut). By including all tissue from these insects, we may have underestimated bacterial densities in the particular organs where microbes are housed (Fig. 1A).

#### *DNA extraction, PCR and sequencing*

Following previous studies of insect microbiomes (6,7,9), we used the MoBio Powersoil kit to extract DNA (100 µl eluate) from measured amounts of sample material. We then PCR-amplified a portion of the 16S rRNA gene with barcoded 515f/806r primers (10). PCR products were cleaned and normalized (up to 25 ng DNA/sample) using the SequalPrep Normalization kit (Thermo Fisher Scientific), and then sequenced on an Illumina MiSeq. Paired-end sequences of 16S rRNA amplicons were merged, quality-filtered, and clustered into operational taxonomic units (“phylotypes”) at the 97% sequence similarity level using UPARSE (11), and classified using the RDP classifier and Greengenes (12,13) as previously described (14). The representative sequences of phylotypes unclassified at this stage, and mitochondrial rRNA phylotypes (which could be from plant, insect, fungal or other mitochondria) were aligned to the NCBI nonredundant nucleotide database (nt) using BLAST for taxonomic identification.

As bacterial DNA is ubiquitous in laboratory reagents used for DNA extraction and PCR, and especially problematic with low-biomass samples (such as caterpillar feces) (15), we removed contaminants from our samples using information from the 22 DNA extraction blanks and PCR no-template controls that yielded >100 bacterial sequences. Importantly, phylotypes detected in these blanks are not exclusively composed of reagent contaminants, because they receive some input from sample DNA during laboratory processing (16). As high-biomass samples are both least likely to experience reagent contamination (15), and themselves most likely to be the source of “real” sample phylotypes identified in blanks, they can be used to distinguish between laboratory contaminants and true sample sequences (16). We classified contaminants as phylotypes present at ≥1% abundance in one or more blank samples, excepting phylotypes present at ≥1% abundance in one or more of the best-amplifying samples (the top third in 16S rRNA gene copy number as measured by qPCR). These 25 phylotypes were removed from the dataset prior to analyses of bacterial abundance and composition (they are retained only in Fig. S2A). This approach does not include other types of contaminants introduced prior to DNA



extraction, such as those from human skin. Finally, we note that the high relatedness between microbes commonly present in laboratory reagents (listed in (15)) and those present in soil, water and leaves—all possible genuine microbial inputs to the caterpillar gut—precludes a taxonomy-based approach to removing contaminants.

### *Sequence Data Analysis*

All analyses were conducted in R version 3.3.2 (17) and are available in the file “Hammer2017\_Rcode\_June2017.R”. Analyses involving bacterial composition were limited to samples with at least 100 bacterial sequences. To calculate phylotype-level overlap between fecal and plant samples, “phylotypes detected on leaves” are defined as those present at any abundance in any plant sample in our dataset. New England and Arizona fecal samples which lack paired plant samples were excluded from this comparison. In measuring core microbiome size in caterpillars and other animals, we excluded species with fewer than three replicate individuals. Further, to be conservative, only caterpillars sampled from the same location, and feeding on the same species of plant were compared. As the number of replicates could affect this metric, and varied among species, we iterated these analyses over multiple combinations of only three replicates per species.

### *Quantitative PCR*

We measured 16S rRNA gene copy number using quantitative PCR with the same primers and DNA extracts as above. Reaction conditions and other details are specified in (18). Each sample was run in triplicate (except 11 non-caterpillar species for which limited DNA was available, which were run singly) and the mean of these technical replicates was used for subsequent analyses. Standard curves were calculated using purified genomic DNA from *E. coli* DH10B, which has seven 16S rRNA operons per genome (19). The median copy number of 31 qPCR'd DNA extraction blanks was subtracted from sample copy numbers. Resulting counts of total 16S rRNA genes in samples were then multiplied by the proportion of bacterial sequences identified from the same DNA extract—excluding contaminants and DNA from plants and other eukaryotes—resulting in estimates of bacterial 16S copy numbers.

It is unlikely that the low amplification we found in caterpillar samples results from primer bias against abundant bacterial taxa. First, these primers successfully amplified bacteria in non-lepidopteran animals, even when in some cases (such as aphids (20)), the dominant symbiont has been strictly vertically transmitted between hosts for tens of millions of years. Even in this case, divergence from free-living relatives has not been so great that its 16S rRNA gene is un-amplifiable using 515f/806r primers. Second, the caterpillar gut-associated microbial taxa we found are similar to those reported as being relatively (i.e., in terms of the proportion of sequence libraries) abundant in metagenomic surveys (21,22) and amplicon-based studies using different 16S rRNA-targeting primer pairs (e.g., (23-27)).

To estimate the relationship between body size and whole-animal microbial loads (Fig. S3), we combined published data from (28) with body mass data we calculated directly or derived from other studies (see file “Body\_mass\_data”). To restrict the allometric scaling relationship for noncaterpillar animals to those species likely to harbor resident microbiomes, we removed species that had bacterial densities  $< 1/100^{\text{th}}$  of the group median. These species were the goose *Branta bernicla*, the bat *Myotis lucifugus*, and the dung beetle *Geotrupes stercorosus*. The body size of two *M. sexta* individuals from Arizona was not recorded and so we substituted the median from other *M. sexta*. Furthermore, as we only had direct gut mass measurements for *M. sexta* (30-40% of body mass), for species sampled using feces (including *M. sexta*) we calculated total microbial loads by multiplying 16S rRNA gene density in feces by body mass. This procedure is likely to have slightly overestimated the microbial load for these species. Despite the numerous methodological uncertainties, microbial counts from (28) and our qPCR-based data, and their allometric scaling relationship with body size (excepting *M. sexta*) were remarkably similar (compare solid and dashed line in Fig. S3).

#### *PCR inhibition assays*

To examine whether low 16S rRNA gene copy number estimates in caterpillar samples are an artifact of caterpillar-specific PCR inhibitors, we used two distinct approaches. First, we tested whether diluting extracted DNA improves PCR amplification by minimizing inhibitor effects (29). However, 1:10 and 1:100 dilutions of fecal DNA from eight *M. sexta* individuals did not have this effect (Fig. S6A). Second, we individually added the twelve lowest-amplifying caterpillar fecal samples—which might be especially likely to contain PCR inhibitors—to qPCR reactions with targeted primers and a template highly unlikely to be present in caterpillar feces (rDNA ITS region of *Batrachochytrium dendrobatidis* strain JEL270, a chytrid fungus pathogenic to amphibians). As compared to replicate reactions with pure molecular-grade water, adding caterpillar fecal DNA reduced amplification of *B. dendrobatidis* rDNA by 7.4% (Fig. S6B). This inhibition effect, which is also present in feces of humans (29) and likely many other species, is miniscule relative to the difference in bacterial loads between caterpillars and non-lepidopterans spanning multiple orders of magnitude (Fig. 1A). Therefore, the relatively low PCR amplification of 16S rRNA genes from caterpillar feces is most likely due to low microbial biomass rather than high PCR-inhibitory substances.

#### *Additional information on the antibiotic experiment*

*M. sexta* larval feces production was measured by collecting, drying (50°C for 24 hours), and weighing all fecal pellets in the final instar. Pupae were weighed six days after pupation and monitored daily for adult eclosion. We collected a fresh fecal pellet from each caterpillar midway through the final instar, from which one subsample was cultured on LB media, and another used for qPCR and sequencing using the aforementioned protocol. To culture bacteria, we plated a dilution series (in sterilized phosphate-buffered saline) of weighed (10-20 mg) subsamples of feces, incubated in aerobic conditions at 37°C. After 24 hours, visible colonies were counted and then, if present, collected *en masse* from the agar surface for sequencing using a sterile swab. This plate-scrape method

produces a list of the most abundant bacterial phylotypes potentially culturable using our approach. It should be noted that the presence of fecal bacteria in culture demonstrates that these taxa were viable, but not necessarily growing or metabolically active, while in the caterpillar gut.

#### *Comparison of biomass estimates and evidence of extracellular DNA*

Among *M. sexta* fecal samples collected during the antibiotic experiment, we found that qPCR-estimated bacterial abundances were correlated with the number of cultured bacterial colonies (see Results; Fig. S4B). Eleven individuals' fecal pellets did not produce any bacterial colonies whatsoever, but did contain measurable levels of DNA (Fig. S4B), and excluding these “zero-colony” samples yielded a stronger association between bacterial colony counts and 16S rRNA gene copy number (Pearson correlation,  $r = 0.51$ ,  $p = 0.0002$ ). This result could stem from the presence of bacteria that cannot grow aerobically or on LB. Alternatively, it may be due to PCR amplification of extracellular DNA or DNA from dead or otherwise nonviable cells (18). To evaluate these possibilities, we compared the phylotypes (identified by 16S rRNA gene sequencing) in zero-colony fecal samples to those from other samples that did yield colonies, in which bacterial biomass was swabbed directly from the agar surface and sequenced. Most of the 16S rRNA gene sequences in the zero-colony fecal samples (median 84%, interquartile range: 74-95%) belong to phylotypes cultured from other samples, suggesting that qPCR may have overestimated viable bacterial loads by amplifying DNA from lysed or nonviable cells. If the fraction of the gut microbiome originating from dead or nonviable cells is disproportionately high in caterpillars in general (e.g., due to their digestive physiology – see Discussion), then the difference in living, active microbial biomass between caterpillars and other animals (Fig. 1A) may have been underestimated.

#### **SI References**

1. Regier JC, et al. (2013) A large-scale, higher-level, molecular phylogenetic study of the insect order Lepidoptera (moths and butterflies). *PLoS One* 8(3):e58568.
2. van Nieukerken EJ, et al. (2011) Order Lepidoptera Linnaeus, 1758. *Animal biodiversity: An outline of higher-level classification and survey of taxonomic richness*, ed Zhang Z-Q (Magnolia Press), pp 212–221.
3. Janzen DH, Hallwachs W (2011) Joining inventory by parataxonomists with DNA barcoding of a large complex tropical conserved wildland in northwestern Costa Rica. *PLoS One* 6(8):e18123.
4. Janzen DH, et al. (2009) Integration of DNA barcoding into an ongoing inventory of complex tropical biodiversity. *Mol Ecol Resour* 9:1–26.
5. Janzen DH, Hallwachs W (2016) DNA barcoding the Lepidoptera inventory of a large complex tropical conserved wildland, Área de Conservación Guanacaste, northwestern Costa Rica. *Genome* 59(9):641–660.

6. Hammer TJ, McMillan WO, Fierer N (2014) Metamorphosis of a butterfly-associated bacterial community. *PLoS One* 9(1):e86995.
7. Hammer TJ, Dickerson JC, Fierer N (2015) Evidence-based recommendations on storing and handling specimens for analyses of insect microbiota. *PeerJ* 3:e1190.
8. Espinosa-Garcia FJ, Langenheim JH (1990) The endophytic fungal community in leaves of a coastal redwood population diversity and spatial patterns. *New Phytol* 116(1):89–97.
9. Hammer TJ, et al. (2016) Treating cattle with antibiotics affects greenhouse gas emissions, and microbiota in dung and dung beetles. *Proc R Soc B* 283(1831):20160150.
10. Caporaso JG, et al. (2012) Ultra-high-throughput microbial community analysis on the Illumina HiSeq and MiSeq platforms. *ISME J* 6(8):1621–1624.
11. Edgar RC (2013) UPARSE: highly accurate OTU sequences from microbial amplicon reads. *Nat Methods* 10(10):996–8.
12. Wang Q, Garrity GM, Tiedje JM, Cole JR (2007) Naive Bayesian classifier for rapid assignment of rRNA sequences into the new bacterial taxonomy. *Appl Environ Microbiol* 73(16):5261–5267.
13. McDonald D, et al. (2012) An improved Greengenes taxonomy with explicit ranks for ecological and evolutionary analyses of bacteria and archaea. *ISME J* 6(3):610–618.
14. Ramirez KS, et al. (2014) Biogeographic patterns in below-ground diversity in New York City’s Central Park are similar to those observed globally. *Proc R Soc B Biol Sci* 281:20141988.
15. Salter SJ, et al. (2014) Reagent and laboratory contamination can critically impact sequence-based microbiome analyses. *BMC Biol* 12(1):87.
16. Lazarevic V, Gaïa N, Girard M, Schrenzel J (2016) Decontamination of 16S rRNA gene amplicon sequence datasets based on bacterial load assessment by qPCR. *BMC Microbiol* 16(1):73.
17. R Core Team (2016) R: A language and environment for statistical computing. *R Found Stat Comput*. Available at: <http://www.r-project.org>.
18. Carini P, et al. (2016) Relic DNA is abundant in soil and obscures estimates of soil microbial diversity. *Nat Microbiol* 53(9):680840.
19. Durfee T, et al. (2008) The complete genome sequence of *Escherichia coli* DH10B: Insights into the biology of a laboratory workhorse. *J Bacteriol* 190(7):2597–2606.
20. Clark MA, Moran NA, Baumann P (1999) Sequence evolution in bacterial endosymbionts having extreme base compositions. *Mol Biol Evol* 16:1586–1598.
21. Belda E, et al. (2011) Microbial diversity in the midguts of field and lab-reared populations of the European corn borer *Ostrinia nubilalis*. *PLoS One* 6(6):e21751.
22. Xia X, et al. (2017) Metagenomic sequencing of diamondback moth gut microbiome unveils key holobiont adaptations for herbivory. *Front Microbiol*. doi:10.3389/fmicb.2017.00663.

23. Broderick NA, Raffa KF, Goodman RM, Handelsman J (2004) Census of the bacterial community of the gypsy moth larval midgut by using culturing and culture-independent methods. *Appl Environ Microbiol* 70(1):293–300.
24. Staudacher H, et al. (2016) Variability of bacterial communities in the moth *Heliothis virescens* indicates transient association with the host. *PLoS One* 11(5):1–21.
25. Mason CJ, Raffa KF (2014) Acquisition and structuring of midgut bacterial communities in gypsy moth (Lepidoptera: Erebidae) larvae. *Environ Entomol* 43(3):595–604.
26. Pinto-Tomás AA, et al. (2011) Comparison of midgut bacterial diversity in tropical caterpillars (Lepidoptera: Saturniidae) fed on different diets. *Environ Entomol* 40(5):1111–1122.
27. Brinkmann N, Martens R, Tebbe CC (2008) Origin and diversity of metabolically active gut bacteria from laboratory-bred larvae of *Manduca sexta* (Sphingidae, Lepidoptera, Insecta). *Appl Environ Microbiol* 74(23):7189–7196.
28. Kieft TL, Simmons KA (2015) Allometry of animal-microbe interactions and global census of animal-associated microbes. *Proc R Soc B* 282:20150702.
29. Nechvatal JM, et al. (2008) Fecal collection, ambient preservation, and DNA extraction for PCR amplification of bacterial and human markers from human feces. *J Microbiol Methods* 72(2):124–132.
